# Supplementary material
Source: PubMed Central journal article supplement (PMC3748602)
Supplement: NIHMS505218-supplement-supplemental_table.pdf [file NIHMS505218-supplement-supplemental_table.pdf]

## Supplementary Online Content

Lowenthal ED, Ellenberg JH, Machine E, et al. Association between efavirenz-based compared with nevirapine-based antiretroviral regimens and virological failure in HIV-infected children. *JAMA*. doi:10.1001/jama.2013.3710

**eTable.** Summary of Propensity Score-based Analyses

This supplementary material has been provided by the authors to give readers additional information about their work.

**eTable.** Summary of Propensity Score-based Analyses

| Covariates included in propensity score model                                                                                                                                                                                           | Number of Subjects with a propensity score generated <sup>†</sup> | Distribution of Propensity scores in NVP group (Median (IQR)) | Distribution of Propensity scores in EFV group (Median (IQR)) | Hazard ratio with inclusion of the propensity score* (95% CI) | Comments                                                                                                                                        |
|-----------------------------------------------------------------------------------------------------------------------------------------------------------------------------------------------------------------------------------------|-------------------------------------------------------------------|---------------------------------------------------------------|---------------------------------------------------------------|---------------------------------------------------------------|-------------------------------------------------------------------------------------------------------------------------------------------------|
| Age at initiation, date of initiation, sex, baseline CDC clinical category, baseline CDC immunologic category, receipt of TB treatment, NRTI regimen, receipt of single-dose NVP, weight-for-height z-score, and height-for-age z-score | 289                                                               | 0.74<br>(0.61-0.84)<br><br>N=174                              | 0.47<br>(0.31-0.60)<br><br>N=115                              | 1.9<br>(1.0-3.8)                                              | This model incorporates the maximum number of measured covariates with potential to have impacted regimen selection.                            |
| Age at initiation, date of initiation, sex, baseline CDC clinical category, baseline CDC immunologic category, receipt of TB treatment, NRTI regimen, receipt of single-dose NVP, weight-for-height z-score, and height-for-age z-score | 698                                                               | 0.64<br>(0.48-0.74)<br><br>N=340                              | 0.39<br>(0.21-0.54)<br><br>N=358                              | 1.9<br>(1.2-2.9)                                              | This model incorporates all measured covariates with potential to have impacted regimen selection, except for baseline viral load. <sup>‡</sup> |
| Age at initiation, date of initiation, sex, baseline CDC clinical category, baseline CDC immunologic category, receipt of TB treatment                                                                                                  | 804                                                               | 0.58<br>(0.45-0.70)<br><br>N=383                              | 0.41<br>(0.24-0.55)<br><br>N=421                              | 1.8<br>(1.2-2.7)                                              | This model is limited to the 6 variables considered most likely to have influenced treatment choice.                                            |

\*Reported hazard ratios are based on the utilization of the propensity score as a continuous variable. In all cases, the odds ratio was slightly higher when propensity score quintiles were utilized.

<sup>†</sup>-missing data may result in absence of propensity score for individual patients

<sup>‡</sup>-baseline viral load values were almost never available when treatment decisions were made; either they were not obtained at all or when obtained, returned well after treatment was initiated.
